# Supplementary material for: A smartphone-adaptable fluorescent sensing tag for non-contact and visual monitoring of the freshness of fish
Source: Royal Society of Chemistry journal article supplement (doi:10.1039/d1an02191e), 2022-01-01
Supplement: d1an02191e1.pdf [file d1an02191e1.pdf]

## Supporting Information

# Smartphone-adaptable Fluorescent Sensing Tag for Non-Contact and Visual Monitoring the Freshness of Fish

Lirong Jiang,<sup>a</sup> Huan Ye,<sup>a</sup> Dini Ma,<sup>a</sup> João Rodrigues,<sup>b</sup> Ruilong Sheng,<sup>b,\*</sup> Douyong Min<sup>a,\*</sup>

<sup>a</sup> School of Light Industry and Food Engineering, Guangxi University, Nanning 530004, P.R. China.

E-mail: [mindouyong@gxu.edu.cn](mailto:mindouyong@gxu.edu.cn) (D. Min).

<sup>b</sup> CQM-Centro de Química da Madeira, Universidade da Madeira, Campus da Penteada, 9000-390 Funchal, Madeira, Portugal. E-mail: [ruilong.sheng@staff.uma.pt](mailto:ruilong.sheng@staff.uma.pt) (R. Sheng).

**Table S1.** Determination results of cadaverine from the spoilage of fish at 0 °C and 25 °C

**Figure S1.** <sup>1</sup>H NMR spectra of PTCN in DMSO-*d*<sub>6</sub> (500 MHz)

**Figure S2.** <sup>13</sup>C NMR spectra of PTCN in DMSO-*d*<sub>6</sub> (125 MHz)

**Figure S3.** HR-MS (ESI) spectra of PTCN

**Figure S4.** HR-MS (ESI) spectra of the product from the reaction of PTCN with cadaverine

**Table 1.** Determination resultsof cadaverine from the spoilage of fish at 0 °C and 25 °C (n =3).

| samples | Stored time (h) | Found (mg/100g) |               | RSD (%) |       |
|---------|-----------------|-----------------|---------------|---------|-------|
|         |                 | 0 °C            | 25 °C         | 0 °C    | 25 °C |
| Fish    | 0               | 11.46 ± 0.23    | 11.33 ± 0.40  | 1.97    | 3.50  |
|         | 3               | 17.63 ± 0.50    | 19.48 ± 0.57  | 2.81    | 2.90  |
|         | 6               | 21.23 ± 0.32    | 30.97 ± 0.35  | 1.50    | 1.14  |
|         | 12              | 26.61 ± 0.43    | 88.45 ± 0.63  | 1.62    | 0.71  |
|         | 24              | 51.63 ± 0.57    | 130.20 ± 0.77 | 1.10    | 0.59  |

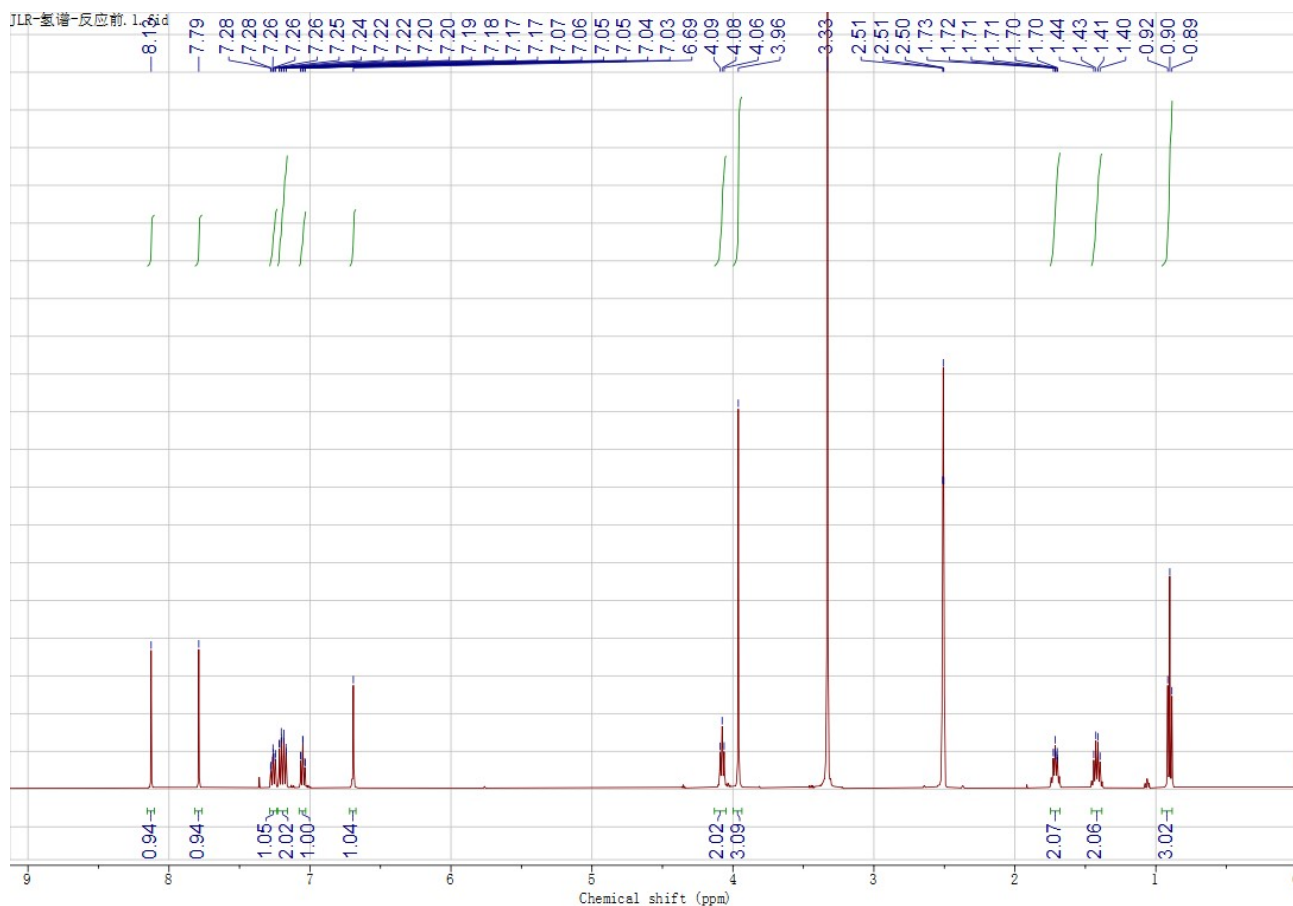

**Figure S1.** <sup>1</sup>H NMR spectra of PTCN in DMSO-*d*<sub>6</sub> (500 MHz)

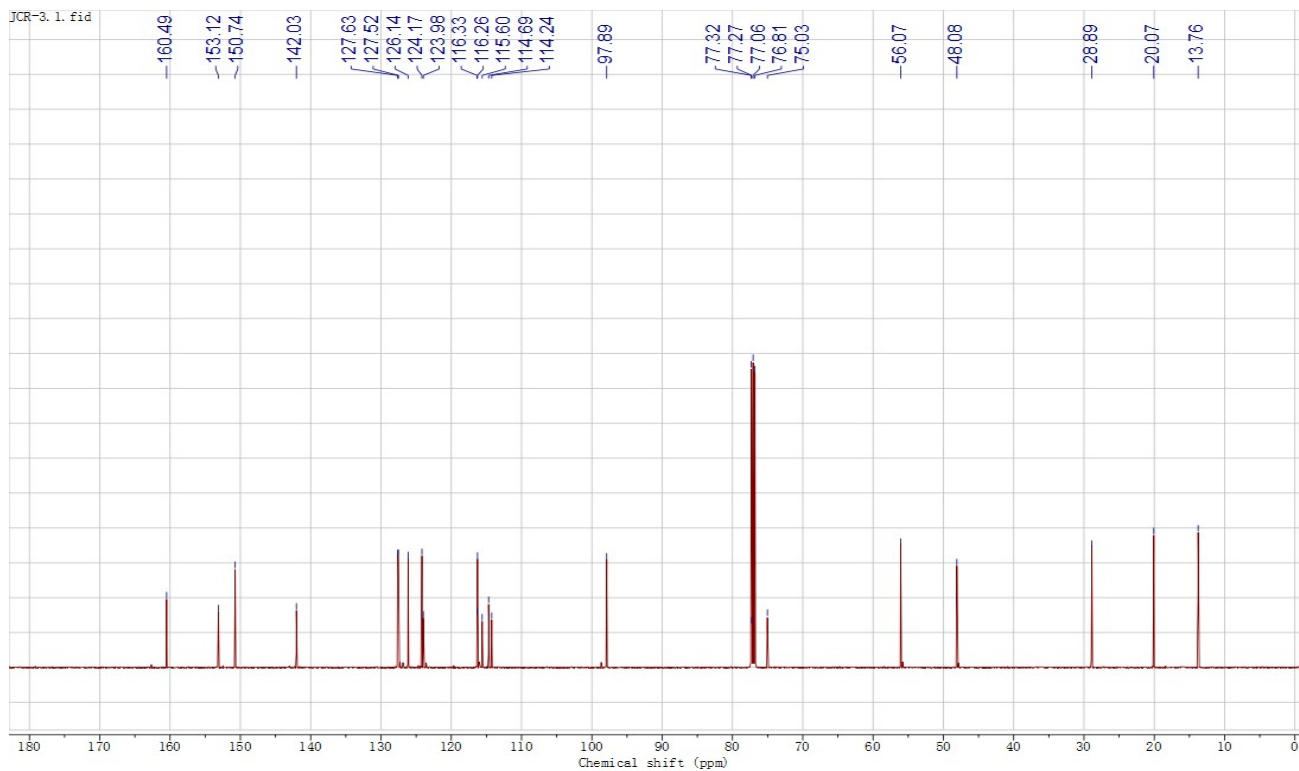

**Figure S2.**  $^{13}\text{C}$  NMR spectra of PTCN in  $\text{DMSO-}d_6$  (125 MHz)

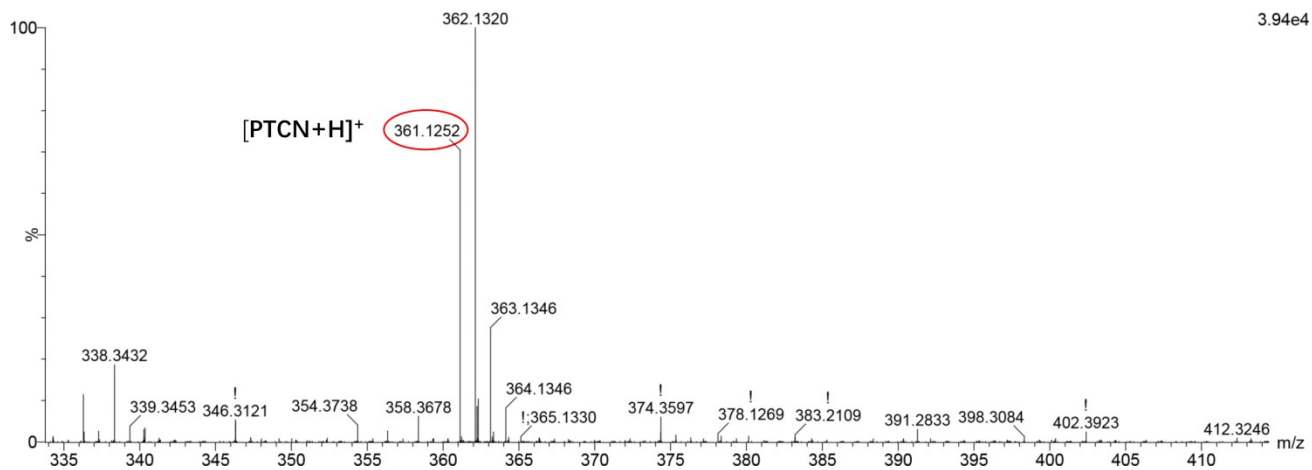

**Figure S3.** HR-MS (ESI) spectra of PTCN.

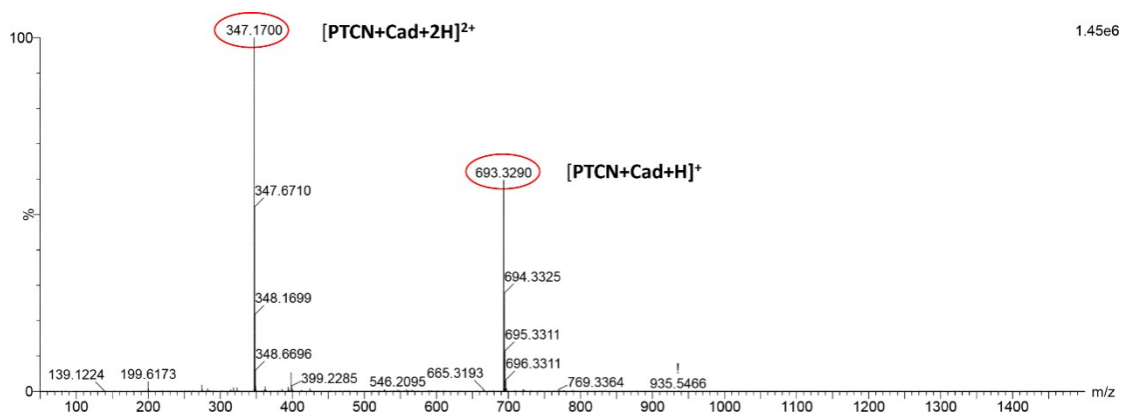

**Figure S4.** HR-MS (ESI) spectra of the product from the reaction of **PTCN** with cadaverine (Cad).
